# Supplementary material for: Fasting and meal‐stimulated serum C‐peptide in long‐standing type 1 diabetes mellitus
Source: PubMed Central journal article supplement — Diabet Med. 2022 Dec 4;40(2):e15012. doi: 10.1111/dme.15012 (PMC10107202; doi:10.1111/dme.15012), 2022-12-04
Supplement: DME-40-0-s001.pdf [file DME-40-0-s001.pdf]

**Supplemental Figure 1. Flowchart of excluded participant numbers and participants excluded from the analyses**

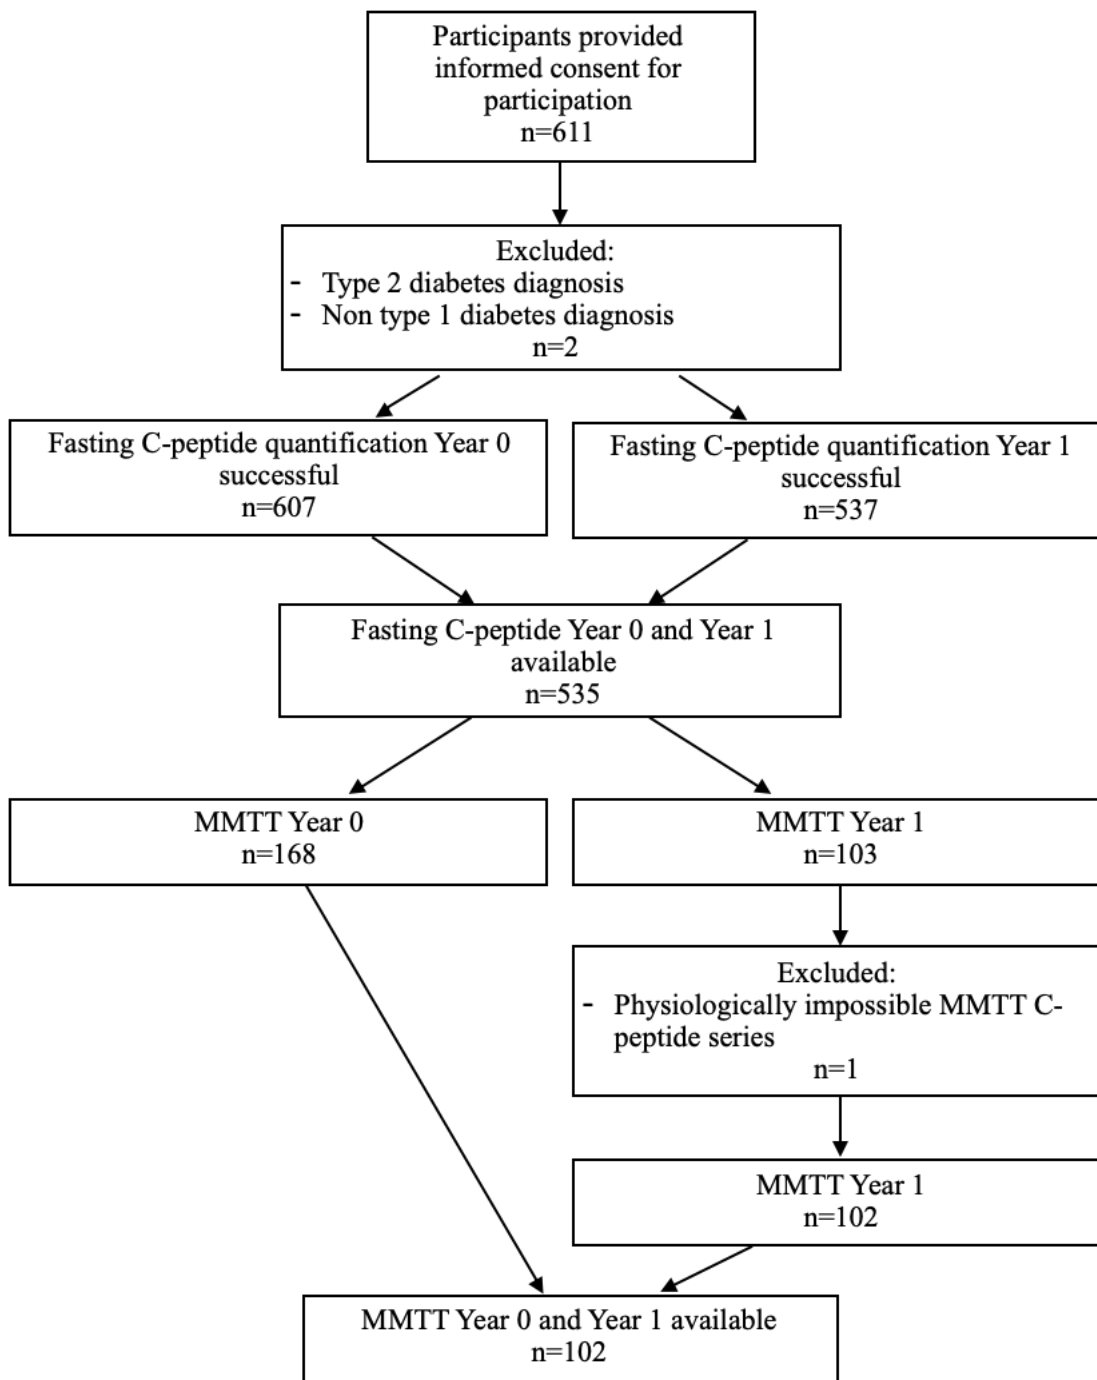

MMTT: Mixed-Meal Tolerance Test

Supplemental Figure 2. Fasting serum C-peptide by diabetes duration at Year 0 n=607

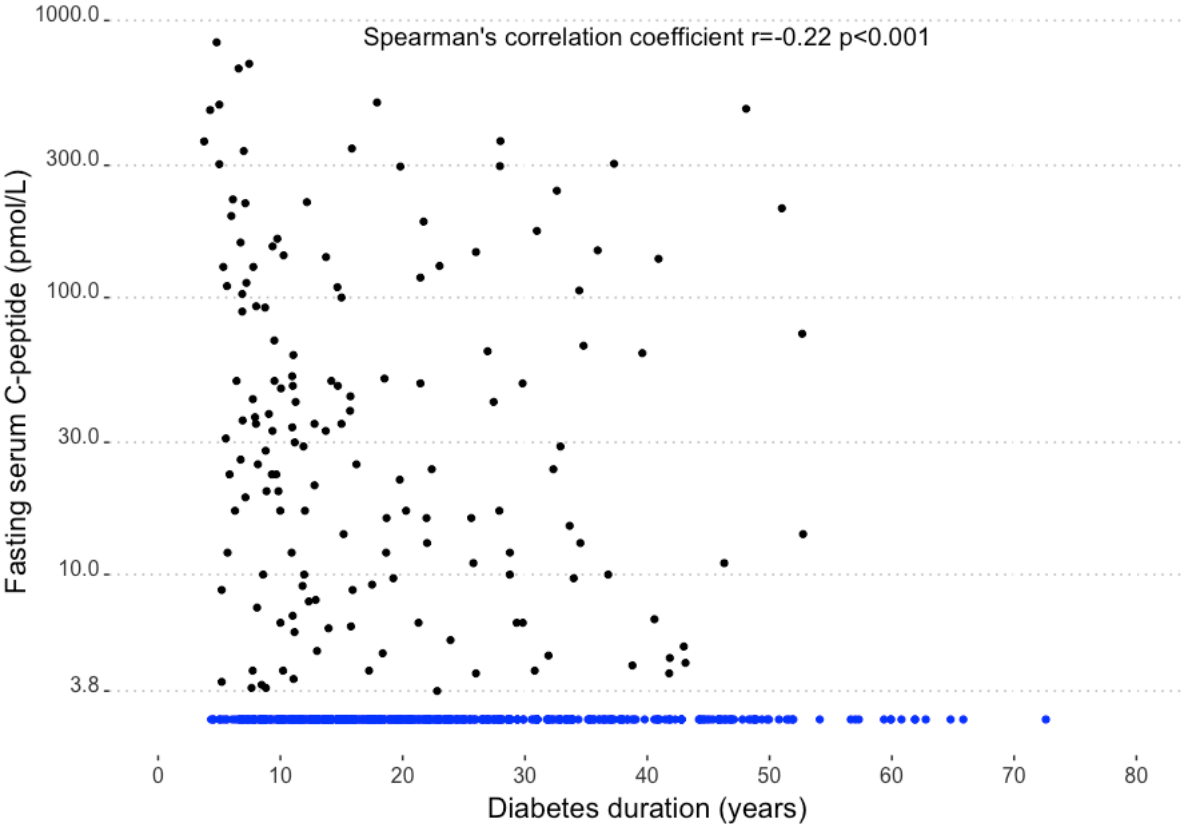

The blue dots represent undetectable C-peptide concentrations.

### Supplemental Figure 3. Relationship between C-peptide during the mixed meal and fasting serum C-peptide

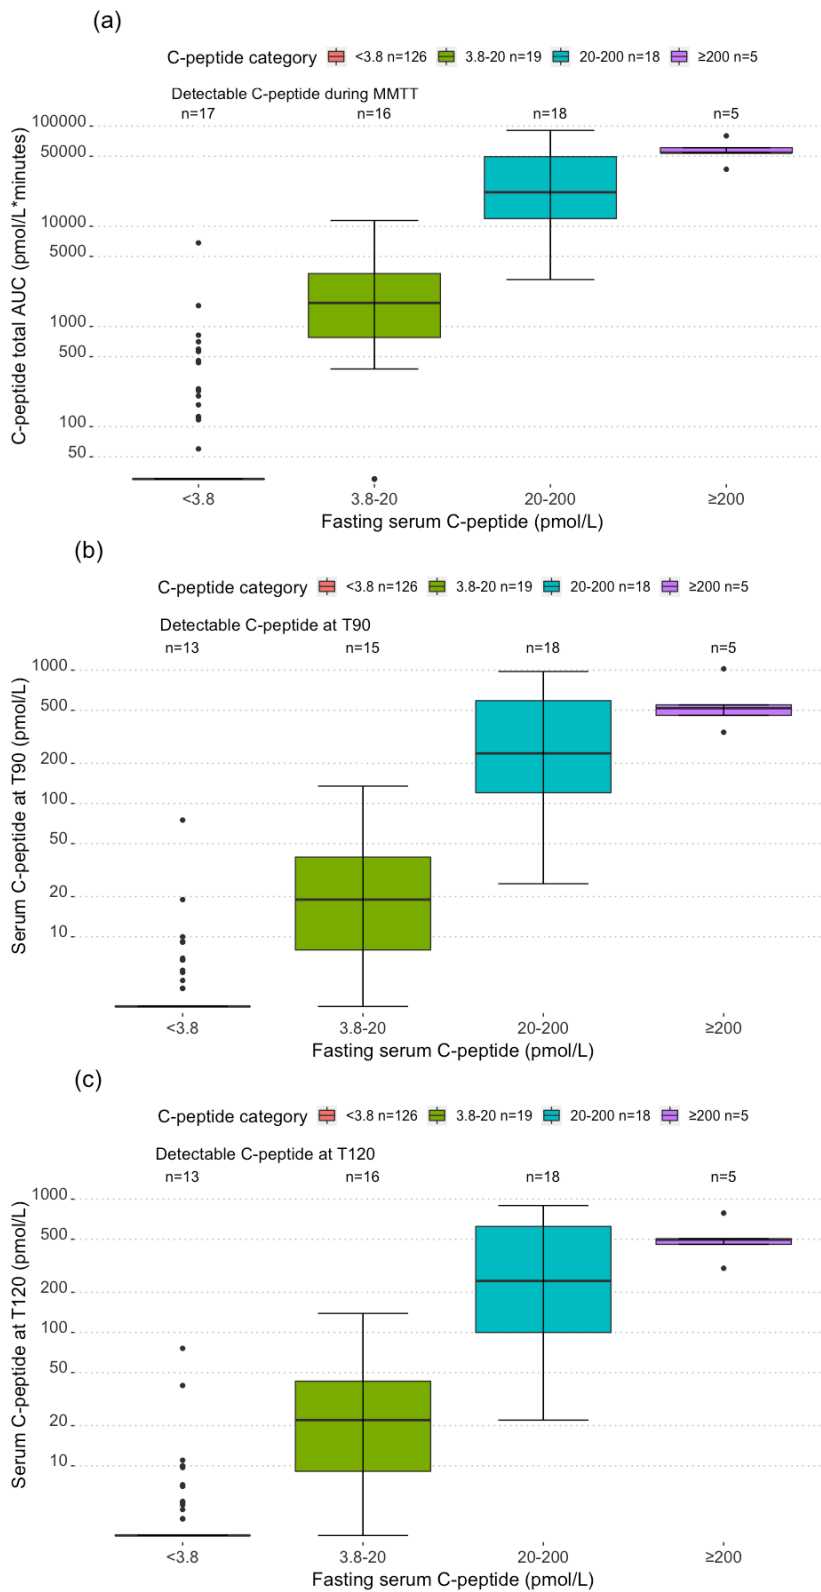

(a) C-peptide total AUC vs fasting serum C-peptide (b) Serum C-peptide at T90 vs fasting serum C-peptide (c) Serum C-peptide at T120 vs fasting serum C-peptide

**Supplemental Table 1. Tobit regression of fasting serum C-peptide Year 0 n=607**

|                                    | Univariate |      |                 | Multivariable |      |                 |
|------------------------------------|------------|------|-----------------|---------------|------|-----------------|
|                                    | B          | SE   | <i>P</i> -value | B             | SE   | <i>P</i> -value |
| Age, years                         | 1.0        | 0.6  | 0.12            |               |      |                 |
| Age at diagnosis, years            | 6.0        | 0.9  | <0.001          | 5.1           | 0.8  | <0.001          |
| Diabetes duration, years           | -4.0       | 0.9  | <0.001          | -3.8          | 0.9  | <0.001          |
| Female sex                         | -5.3       | 21.9 | 0.81            |               |      |                 |
| Body mass index, kg/m <sup>2</sup> | 1.2        | 2.9  | 0.68            |               |      |                 |
| Total daily insulin dose, U/day    | -0.7       | 0.5  | 0.20            |               |      |                 |
| Insulin pump use (vs MDI)          | -85.6      | 21.8 | <0.001          | -51.6         | 21.3 | 0.02            |

Fasting serum C-peptide is in pmol/L.

Number of missing values: BMI – 42, Daily insulin dose – 19, Pump use (vs MDI) – 7, all other covariates no missing values. Number of missing values in multivariable analysis – 19.

**Supplemental Table 2. C-peptide response after the mixed meal at first and second MMTT**

|                                 |                                | C-peptide response after mixed meal |     | Detectable C-peptide at T90/T120 | C-peptide AUC of MMTT responders (AUC > 0) |
|---------------------------------|--------------------------------|-------------------------------------|-----|----------------------------------|--------------------------------------------|
|                                 |                                | no                                  | yes | yes                              |                                            |
| First MMTT (Year 0)<br>n = 168  | Fasting C-peptide < 3.8 pmol/l | 109                                 | 17  | 13/13                            | 435 [165, 594]                             |
|                                 | Fasting C-peptide ≥ 3.8 pmol/l | 5                                   | 37  | 38/39                            | 11,160 [2,702, 42,773]                     |
| Second MMTT (Year 1)<br>n = 102 | Fasting C-peptide < 3.8 pmol/l | 64                                  | 8   | 7/6                              | 356 [172, 472]                             |
|                                 | Fasting C-peptide ≥ 3.8 pmol/l | 2                                   | 28  | 29/29                            | 6,870 [2,507, 26,850]                      |

C-peptide response after mixed-meal is categorized based on the peak C-peptide value, yes indicates the peak C-peptide after MMTT was similar to or higher than the fasting C-peptide concentration. The discrepant fasting and stimulated C-peptides are highlighted in red, total n = 22 (13%) at first MMTT, at second MMTT n = 10 (10%). At Year 0 MMTT T0 C-peptide corresponds to fasting C-peptide in n=52 (31%). At Year 1 MMTT T0 C-peptide corresponds to fasting C-peptide in n=81 (79%).

**Supplemental Table 3. Tobit regression of C-peptide total AUC of MMTT Year 0 n=168**

|                                    | Univariate |      |                 | Multivariable |      |                 |
|------------------------------------|------------|------|-----------------|---------------|------|-----------------|
|                                    | B          | SE   | <i>P</i> -value | B             | SE   | <i>P</i> -value |
| Age, years                         | -42        | 202  | 0.83            |               |      |                 |
| Age at diagnosis, years            | 1064       | 297  | <0.001          | 1123          | 285  | <0.001          |
| Diabetes duration, years           | -911       | 301  | 0.002           | -759          | 278  | 0.006           |
| Female sex                         | -2021      | 6365 | 0.75            |               |      |                 |
| Body mass index, kg/m <sup>2</sup> | -2231      | 944  | 0.02            | -1815         | 870  | 0.03            |
| Total daily insulin dose, U/ day   | 161        | 166  | 0.33            |               |      |                 |
| Insulin pump use (vs MDI)          | -19112     | 6425 | 0.003           | -16900        | 5990 | 0.005           |

C-peptide AUC of MMTT is in pmol/L\*minutes

Number of missing values: BMI – 5, Daily insulin dose – 4, Pump use (vs MDI) – 1, all other covariates no missing values. Number of missing values in multivariable analysis – 5.

MDI: multiple daily injections

MMTT: Mixed-Meal Tolerance Test
